# Supplementary material for: Heterolepticmer-[Cr(N∩N∩N)(CN)3] complexes: synthetic challenge, structural characterization and photophysical properties
Source: Royal Society of Chemistry journal article supplement (doi:10.1039/d2dt00126h), 2022-01-01
Supplement: d2dt00126h1.pdf [file d2dt00126h1.pdf]

**Heteroleptic *mer*-[Cr(N<sup>⊖</sup>N<sup>⊖</sup>N)(CN)<sub>3</sub>] complexes: synthetic challenge, structural characterization and photophysical properties.**

Julien Chong, Céline Besnard, Carlos M. Cruz, Claude Piguet\* and Juan-Ramón Jiménez\*

**Supporting Information**

(44 pages)

**Table S1** Ligand field  $\Delta$  and Racah  $B$  and  $C$  parameters reported for  $[\text{CrF}_6]^{3-}$ ,  $[\text{Cr}(\text{H}_2\text{O})_6]^{3+}$ ,  $[\text{Cr}(\text{NH}_3)_6]^{3+}$ ,  $[\text{Cr}(\text{CN})_6]^{3-}$ ,  $[\text{Cr}(\text{tpy})_2]^{3+}$ ,  $[\text{Cr}(\text{ddpd})_2]^{3+}$  and  $[\text{Cr}(\text{dqp})_2]^{3+}$  at 293 K.

| Compound                                 | $\Delta/\text{cm}^{-1}$ | $B/\text{cm}^{-1}$ | $C/\text{cm}^{-1}$ | $\Delta/B$ | $C/B$            | Ref. |
|------------------------------------------|-------------------------|--------------------|--------------------|------------|------------------|------|
| $[\text{CrF}_6]^{3-}$                    | 15200                   | 820                | 3280               | 18.5       | 4.0 <sup>a</sup> | S1   |
| $[\text{Cr}(\text{H}_2\text{O})_6]^{3+}$ | 17390                   | 725                | 2900               | 24.0       | 4.0 <sup>a</sup> | S1   |
| $[\text{Cr}(\text{NH}_3)_6]^{3+}$        | 21550                   | 650                | 2600               | 33.2       | 4.0 <sup>a</sup> | S1   |
| $[\text{Cr}(\text{CN})_6]^{3-}$          | 26700                   | 530                | 2120               | 50.4       | 4.0 <sup>a</sup> | S1   |
| $[\text{Cr}(\text{tpy})_2]^{3+}$         | 18750                   | 790                | 2512               | 23.8       | 3.2              | S2   |
| $[\text{Cr}(\text{ddpd})_2]^{3+}$        | 22883                   | 763                | 2442               | 30.0       | 3.2              | S3   |
| $[\text{Cr}(\text{dqp})_2]^{3+}$         | 24937                   | 656                | 2791               | 38.0       | 4.3              | S4   |

<sup>a</sup> The Racah parameters were calculated assuming  $C = 4.0B$ .



**Figure S1** IR spectra of [Cr(L)Br<sub>3</sub>] (L = tpy, ddpd, dqp) recorded in the solid state at 293 K.

**Table S2.** Elemental analyses found for the heteroleptic Cr<sup>III</sup> complexes measured as powders.<sup>a</sup>

| Compound                                                                             | Found<br>C, H, N (%) | Calculated<br>C, H, N (%) | Molecular<br>Formula                                                                                      | MW<br>/g.mol <sup>-1</sup> |
|--------------------------------------------------------------------------------------|----------------------|---------------------------|-----------------------------------------------------------------------------------------------------------|----------------------------|
| [Cr(tpy)Br <sub>3</sub> ]                                                            | 34.47, 2.45, 7.84    | 34.32, 2.11, 7.84         | C <sub>15</sub> H <sub>11</sub> N <sub>3</sub> Br <sub>3</sub> Cr                                         | 525.0                      |
| [Cr(ddpd)Br <sub>3</sub> ]                                                           | 35.43, 3.30, 12.01   | 35.02, 2.94, 12.01        | C <sub>17</sub> H <sub>17</sub> N <sub>5</sub> Br <sub>3</sub> Cr                                         | 583.1                      |
| [Cr(dqp)Br <sub>3</sub> ]                                                            | 43.81, 2.58, 6.51    | 44.19, 2.42, 6.72         | C <sub>23</sub> H <sub>15</sub> N <sub>3</sub> Br <sub>3</sub> Cr                                         | 625.1                      |
| [Cr(tpy)(CN) <sub>3</sub> ]·1.7H <sub>2</sub> O                                      | 54.47, 3.28, 21.22   | 54.88, 3.68, 21.33        | C <sub>18</sub> H <sub>11</sub> N <sub>6</sub> Cr·1.7H <sub>2</sub> O                                     | 393.9                      |
| [Cr(ddpd)(CN) <sub>3</sub> ]·0.85H <sub>2</sub> O·1.3CH <sub>2</sub> Cl <sub>2</sub> | 46.90, 4.10, 20.33   | 46.78, 3.92, 20.48        | C <sub>20</sub> H <sub>17</sub> N <sub>8</sub> Cr·0.85H <sub>2</sub> O·1.3CH <sub>2</sub> Cl <sub>2</sub> | 547.1                      |
| [Cr(dqp)(CN) <sub>3</sub> ]·1.5H <sub>2</sub> O·1.7CH <sub>2</sub> Cl <sub>2</sub>   | 52.49, 3.55, 13.10   | 52.41, 3.40, 13.24        | C <sub>26</sub> H <sub>15</sub> N <sub>6</sub> Cr·1.5H <sub>2</sub> O·1.7CH <sub>2</sub> Cl <sub>2</sub>  | 634.8                      |

<sup>a</sup> The nature of the solvent molecules are deduced from IR spectroscopies and the solvent contents were obtained by multi-linear least-square fits of the experimental %C, % H, %N data.

**Table S3** Crystal data and structure refinement for complex [Ct(tpy)Br<sub>3</sub>].

|                                        |                                                                  |                            |
|----------------------------------------|------------------------------------------------------------------|----------------------------|
| CCDC                                   | 213357                                                           |                            |
| Empirical formula                      | C <sub>15</sub> H <sub>11</sub> Br <sub>3</sub> CrN <sub>3</sub> |                            |
| Formula weight                         | 525.00                                                           |                            |
| Temperature                            | 120.00(10) K                                                     |                            |
| Wavelength                             | 1.54184 Å                                                        |                            |
| Crystal system                         | Monoclinic                                                       |                            |
| Space group                            | P 1 21/n 1                                                       |                            |
| Unit cell dimensions                   | $a = 8.4851(2)$ Å                                                | $\alpha = 90^\circ$        |
|                                        | $b = 14.3395(2)$ Å                                               | $\beta = 106.309(2)^\circ$ |
|                                        | $c = 13.9396(3)$ Å                                               | $\gamma = 90^\circ$        |
| Volume                                 | 1627.81(6) Å <sup>3</sup>                                        |                            |
| Z                                      | 4                                                                |                            |
| Density (calculated)                   | 2.142 Mg/m <sup>3</sup>                                          |                            |
| Absorption coefficient                 | 14.393 mm <sup>-1</sup>                                          |                            |
| $F(000)$                               | 1004                                                             |                            |
| Crystal size                           | 0.124 x 0.08 x 0.049 mm <sup>3</sup>                             |                            |
| Theta range for data collection        | 4.520 to 73.947°.                                                |                            |
| Index ranges                           | -10 ≤ $h$ ≤ 10, -12 ≤ $k$ ≤ 17, -17 ≤ $l$ ≤ 17                   |                            |
| Reflections collected                  | 29627                                                            |                            |
| Independent reflections                | 3273 [ $R(\text{int}) = 0.0366$ ]                                |                            |
| Completeness to theta = 67.684°        | 100.0 %                                                          |                            |
| Absorption correction                  | Gaussian                                                         |                            |
| Max. and min. transmission             | 0.820 and 0.390                                                  |                            |
| Refinement method                      | Full-matrix least-squares on $F^2$                               |                            |
| Data / restraints / parameters         | 3273 / 0 / 199                                                   |                            |
| Goodness-of-fit on $F^2$               | 1.073                                                            |                            |
| Final $R$ indices [ $I > 2\sigma(I)$ ] | $R1 = 0.0212$ , $wR2 = 0.0548$                                   |                            |
| $R$ indices (all data)                 | $R1 = 0.0218$ , $wR2 = 0.0551$                                   |                            |
| Extinction coefficient                 | n/a                                                              |                            |
| Largest diff. peak and hole            | 0.370 and -0.578 e.Å <sup>-3</sup>                               |                            |



**Figure S2** ORTEP view of [Cr(tpy)Br<sub>3</sub>] at 50% probability level with numbering scheme.



**Figure S3** Optimized superimposition of the molecular structures of [Cr(L)Cl<sub>3</sub>] (green) and [Cr(L)Br<sub>3</sub>] (red) with a) L = tpy and b) L = ddpd.

**Table S4** Selected bond distances (Å) and bond angles (°) for complex [Cr(tpy)Br<sub>3</sub>].

| Bond Distances / Å |      |           |      |      |            |
|--------------------|------|-----------|------|------|------------|
| Atom               | Atom | Length/Å  | Atom | Atom | Length/Å   |
| Br1                | Cr1  | 2.4995(4) | Cr1  | N1   | 2.0718(19) |
| Br2                | Cr1  | 2.4532(4) | Cr1  | N2   | 1.9891(19) |
| Br3                | Cr1  | 2.4667(4) | Cr1  | N3   | 2.0753(19) |

| Bond Angles (°) |      |      |             |
|-----------------|------|------|-------------|
| Atom            | Atom | Atom | Angle /°    |
| Br2             | Cr1  | Br1  | 90.600(14)  |
| Br2             | Cr1  | Br3  | 93.009(14)  |
| Br3             | Cr1  | Br1  | 176.302(17) |
| N1              | Cr1  | Br1  | 90.05(5)    |
| N1              | Cr1  | Br2  | 99.81(5)    |
| N1              | Cr1  | Br3  | 90.13(5)    |
| N1              | Cr1  | N3   | 156.71(8)   |
| N2              | Cr1  | Br1  | 85.86(5)    |
| N2              | Cr1  | Br2  | 176.02(5)   |
| N2              | Cr1  | Br3  | 90.56(5)    |
| N2              | Cr1  | N1   | 78.41(7)    |
| N2              | Cr1  | N3   | 78.37(7)    |
| N3              | Cr1  | Br1  | 90.06(5)    |
| N3              | Cr1  | Br2  | 103.47(5)   |
| N3              | Cr1  | Br3  | 88.32(5)    |

**Table S5** Selected least-squares planes data for complex [Cr(tpy)Br<sub>3</sub>].

| Plane                              | mean deviation in Å | max deviation in Å (atom) |
|------------------------------------|---------------------|---------------------------|
| <b>Py1:</b> N1 C1 C2 C3 C4 C5      | 0.017               | 0.026 (N1)                |
| <b>Py2:</b> N2 C6 C7 C8 C9 C10     | 0.011               | 0.018 (N2)                |
| <b>Py3:</b> N3 C11 C12 C13 C14 C15 | 0.007               | 0.011 (C11)               |

Mean and maximum deviation between the atoms of the pyridine rings and their best plane.

| Planes                | Py1- Py2 | Py1- Py3 | Py2- Py3 |
|-----------------------|----------|----------|----------|
| Interplanar angle (°) | 7.16(7)  | 3.57(7)  | 4.07(7)  |

**Table S6** Crystal data and structure refinement for [Cr(tpy)(CN)<sub>3</sub>].

|                                        |                                                  |                            |
|----------------------------------------|--------------------------------------------------|----------------------------|
| CCDC                                   | 2133577                                          |                            |
| Empirical formula                      | C <sub>18</sub> H <sub>11</sub> CrN <sub>6</sub> |                            |
| Formula weight                         | 363.33                                           |                            |
| Temperature                            | 119.99(14) K                                     |                            |
| Wavelength                             | 1.54184 Å                                        |                            |
| Crystal system                         | Monoclinic                                       |                            |
| Space group                            | P 1 21/n 1                                       |                            |
| Unit cell dimensions                   | $a = 9.09570(10)$ Å                              | $\alpha = 90^\circ$        |
|                                        | $b = 13.1460(2)$ Å                               | $\beta = 107.079(2)^\circ$ |
|                                        | $c = 14.3005(2)$ Å                               | $\gamma = 90^\circ$        |
| Volume                                 | 1634.53(4) Å <sup>3</sup>                        |                            |
| Z                                      | 4                                                |                            |
| Density (calculated)                   | 1.476 Mg/m <sup>3</sup>                          |                            |
| Absorption coefficient                 | 5.864 mm <sup>-1</sup>                           |                            |
| $F(000)$                               | 740                                              |                            |
| Crystal size                           | 0.157 x 0.098 x 0.037 mm <sup>3</sup>            |                            |
| Theta range for data collection        | 4.667 to 73.664°.                                |                            |
| Index ranges                           | -11 ≤ $h$ ≤ 11, -16 ≤ $k$ ≤ 13, -17 ≤ $l$ ≤ 17   |                            |
| Reflections collected                  | 91918                                            |                            |
| Independent reflections                | 3295 [ $R(\text{int}) = 0.0468$ ]                |                            |
| Completeness to theta = 67.684°        | 100.0 %                                          |                            |
| Absorption correction                  | Gaussian                                         |                            |
| Max. and min. transmission             | 1.000 and 0.524                                  |                            |
| Refinement method                      | Full-matrix least-squares on $F^2$               |                            |
| Data / restraints / parameters         | 3295 / 0 / 227                                   |                            |
| Goodness-of-fit on $F^2$               | 1.133                                            |                            |
| Final $R$ indices [ $I > 2\sigma(I)$ ] | $R1 = 0.0298$ , $wR2 = 0.0882$                   |                            |
| $R$ indices (all data)                 | $R1 = 0.0301$ , $wR2 = 0.0884$                   |                            |
| Extinction coefficient                 | 0.00046(13)                                      |                            |
| Largest diff. peak and hole            | 0.356 and -0.430 e.Å <sup>-3</sup>               |                            |



**Figure S4** ORTEP view of [Cr(tpy)(CN)<sub>3</sub>] at 50% probability level with numbering scheme.

**Table S7** Selected bond distances (Å) and bond angles (°) for complex [Cr(tpy)(CN)<sub>3</sub>].

| Bond Distances / Å |      |            |      |      |            |
|--------------------|------|------------|------|------|------------|
| Atom               | Atom | Length/Å   | Atom | Atom | Length/Å   |
| Cr1                | N1   | 2.0636(13) | Cr1  | C16  | 2.0748(15) |
| Cr1                | N2   | 1.9932(12) | Cr1  | C17  | 2.0593(16) |
| Cr1                | N3   | 2.0692(13) | Cr1  | C18  | 2.0771(16) |

  

| Bond Angles (°) |      |      |           |
|-----------------|------|------|-----------|
| Atom            | Atom | Atom | Angle /°  |
| N1              | Cr1  | N3   | 156.84(5) |
| N1              | Cr1  | C16  | 87.77(6)  |
| N1              | Cr1  | C18  | 92.76(6)  |
| N2              | Cr1  | N1   | 78.52(5)  |
| N2              | Cr1  | N3   | 78.38(5)  |
| N2              | Cr1  | C16  | 89.40(5)  |
| N2              | Cr1  | C17  | 175.17(6) |
| N2              | Cr1  | C18  | 93.67(6)  |
| N3              | Cr1  | C16  | 93.52(5)  |
| N3              | Cr1  | C18  | 87.18(6)  |
| C16             | Cr1  | C18  | 176.93(6) |
| C17             | Cr1  | N1   | 98.50(6)  |
| C17             | Cr1  | N3   | 104.65(6) |
| C17             | Cr1  | C16  | 86.67(6)  |
| C17             | Cr1  | C18  | 90.26(6)  |

**Table S8** Selected least-squares planes data for complex [Cr(tpy)(CN)<sub>3</sub>].

| Plane                              | mean deviation in Å | max deviation in Å (atom) |
|------------------------------------|---------------------|---------------------------|
| <b>Py1:</b> N2 C6 C7 C8 C9 C10     | 0.011               | 0.016 (N2, C8)            |
| <b>Py2:</b> N3 C11 C12 C13 C14 C15 | 0.002               | 0.003 (C14, C15)          |
| <b>Py3:</b> N1 C1 C2 C3 C4 C5      | 0.012               | 0.018 (N1, C5)            |

Mean and maximum deviation between the atoms of the pyridine rings and their best plane.

| Planes                | Py1- Py2 | Py1- Py3 | Py2- Py3 |
|-----------------------|----------|----------|----------|
| Interplanar angle (°) | 1.70     | 8.60     | 7.99     |

**Table S9** Crystal data and structure refinement for [Cr(ddpd)(CN)<sub>3</sub>] $\cdot$ 2H<sub>2</sub>O.

|                                        |                                                                  |                              |
|----------------------------------------|------------------------------------------------------------------|------------------------------|
| CCDC                                   | 2133575                                                          |                              |
| Empirical formula                      | C <sub>20</sub> H <sub>21</sub> CrN <sub>8</sub> O <sub>2</sub>  |                              |
| Formula weight                         | 457.45                                                           |                              |
| Temperature                            | 120(2) K                                                         |                              |
| Wavelength                             | 1.54184 Å                                                        |                              |
| Crystal system                         | Monoclinic                                                       |                              |
| Space group                            | C 1 2/c 1                                                        |                              |
| Unit cell dimensions                   | $a = 11.9309(2)$ Å                                               | $\alpha = 90^\circ$          |
|                                        | $b = 13.5078(2)$ Å                                               | $\beta = 102.2381(18)^\circ$ |
|                                        | $c = 13.8221(3)$ Å                                               | $\gamma = 90^\circ$          |
| Volume                                 | 2176.94(7) Å <sup>3</sup>                                        |                              |
| Z                                      | 4                                                                |                              |
| Density (calculated)                   | 1.396 Mg/m <sup>3</sup>                                          |                              |
| Absorption coefficient                 | 4.613 mm <sup>-1</sup>                                           |                              |
| $F(000)$                               | 948                                                              |                              |
| Crystal size                           | 0.848 x 0.358 x 0.238 mm <sup>3</sup>                            |                              |
| Theta range for data collection        | 5.011 to 73.389°.                                                |                              |
| Index ranges                           | -14 $\leq h \leq$ 14, -14 $\leq k \leq$ 16, -17 $\leq l \leq$ 17 |                              |
| Reflections collected                  | 20649                                                            |                              |
| Independent reflections                | 2182 [ $R(\text{int}) = 0.0251$ ]                                |                              |
| Completeness to theta = 67.684°        | 99.9 %                                                           |                              |
| Absorption correction                  | Analytical                                                       |                              |
| Max. and min. transmission             | 0.448 and 0.178                                                  |                              |
| Refinement method                      | Full-matrix least-squares on $F^2$                               |                              |
| Data / restraints / parameters         | 2182 / 0 / 150                                                   |                              |
| Goodness-of-fit on $F^2$               | 1.137                                                            |                              |
| Final $R$ indices [ $I > 2\sigma(I)$ ] | $R1 = 0.0257$ , $wR2 = 0.0740$                                   |                              |
| $R$ indices (all data)                 | $R1 = 0.0258$ , $wR2 = 0.0741$                                   |                              |
| Extinction coefficient                 | n/a                                                              |                              |
| Largest diff. peak and hole            | 0.233 and -0.370 e.Å <sup>-3</sup>                               |                              |



**Figure S5** ORTEP view of  $[\text{Cr}(\text{ddpd})(\text{CN})_3]$  at 50% probability level with numbering scheme in the crystal structure of  $[\text{Cr}(\text{ddpd})(\text{CN})_3] \cdot 2\text{H}_2\text{O}$ .

**Table S10** Selected bond distances ( $\text{\AA}$ ) and bond angles ( $^\circ$ ) for complex  $[\text{Cr}(\text{ddpd})(\text{CN})_3] \cdot 2\text{H}_2\text{O}$ .

| Bond Distances / $\text{\AA}$ |      |                      |      |      |                      |
|-------------------------------|------|----------------------|------|------|----------------------|
| Atom                          | Atom | Length/ $\text{\AA}$ | Atom | Atom | Length/ $\text{\AA}$ |
| Cr1                           | N1*  | 2.0556(12)           | Cr1  | C1   | 2.080(2)             |
| Cr1                           | N1   | 2.0556(12)           | Cr1  | C2   | 2.0868(15)           |
| Cr1                           | N2   | 2.0408(16)           | Cr1  | C2*  | 2.0868(15)           |

\*Symmetry transformations used to generate equivalent atoms:  $-x+1, y, -z+3/2$ .

| Bond Angles (°) |      |      |           |
|-----------------|------|------|-----------|
| Atom            | Atom | Atom | Angle /°  |
| N1*             | Cr1  | N1   | 174.59(6) |
| N1*             | Cr1  | C1   | 92.71(3)  |
| N1              | Cr1  | C1   | 92.71(3)  |
| N1*             | Cr1  | C2*  | 91.72(5)  |
| N1              | Cr1  | C2   | 91.72(5)  |
| N1*             | Cr1  | C2   | 88.33(5)  |
| N1              | Cr1  | C2*  | 88.33(5)  |
| N2              | Cr1  | N1   | 87.29(3)  |
| N2              | Cr1  | N1*  | 87.29(3)  |
| N2              | Cr1  | C1   | 180       |
| N2              | Cr1  | C2*  | 90.55(3)  |
| N2              | Cr1  | C2   | 90.55(3)  |
| C1              | Cr1  | C2   | 89.45(3)  |
| C1              | Cr1  | C2*  | 89.45(3)  |
| C2              | Cr1  | C2*  | 178.90(7) |

\*Symmetry transformations used to generate equivalent atoms:  $-x+1, y, -z+3/2$ .

**Table S11** Selected least-squares planes data for complex  $[\text{Cr}(\text{ddpd})(\text{CN})_3]\cdot 2\text{H}_2\text{O}$ .

| Plane                                | mean deviation in Å | max deviation in Å (atom) |
|--------------------------------------|---------------------|---------------------------|
| <b>Py1:</b> N2 C9 C10 C11 C9* C10*   | 0.001               | 0.002 (C9,C10, C9*,C10*)  |
| <b>Py2:</b> N1 C3 C4 C5 C6 C7        | 0.011               | 0.021 (N1)                |
| <b>Py2*:</b> N1* C3* C4* C5* C6* C7* | 0.011               | 0.021 (N1*)               |

Mean and maximum deviation between the atoms of the pyridine rings and their best plane.

| Planes                | Py1- Py2 | Py2- Py2* |
|-----------------------|----------|-----------|
| Interplanar angle (°) | 44.12    | 73.55     |

\*Symmetry transformations used to generate equivalent atoms:  $-x+1, y, -z+3/2$ .

**Table S12** Crystal data and structure refinement for [Cr(dqp)(CN)<sub>3</sub>] $\cdot$ 3.28H<sub>2</sub>O.<sup>a</sup>

|                                        |                                                                       |                            |
|----------------------------------------|-----------------------------------------------------------------------|----------------------------|
| CCDC                                   | 2133576                                                               |                            |
| Empirical formula                      | C <sub>26</sub> H <sub>21.55</sub> CrN <sub>6</sub> O <sub>3.28</sub> |                            |
| Formula weight                         | 522.45                                                                |                            |
| Temperature                            | 120.00(14) K                                                          |                            |
| Wavelength                             | 1.54184 Å                                                             |                            |
| Crystal system                         | Triclinic                                                             |                            |
| Space group                            | P-1                                                                   |                            |
| Unit cell dimensions                   | $a = 10.1680(3)$ Å                                                    | $\alpha = 67.150(2)^\circ$ |
|                                        | $b = 10.6947(2)$ Å                                                    | $\beta = 76.292(2)^\circ$  |
|                                        | $c = 12.3560(3)$ Å                                                    | $\gamma = 85.697(2)^\circ$ |
| Volume                                 | 1202.71(5) Å <sup>3</sup>                                             |                            |
| Z                                      | 2                                                                     |                            |
| Density (calculated)                   | 1.443 Mg/m <sup>3</sup>                                               |                            |
| Absorption coefficient                 | 4.271 mm <sup>-1</sup>                                                |                            |
| $F(000)$                               | 540                                                                   |                            |
| Crystal size                           | 0.139 x 0.119 x 0.08 mm <sup>3</sup>                                  |                            |
| Theta range for data collection        | 3.986 to 73.872°.                                                     |                            |
| Index ranges                           | -12 $\leq h \leq$ 12, -12 $\leq k \leq$ 13, -11 $\leq l \leq$ 15      |                            |
| Reflections collected                  | 29393                                                                 |                            |
| Independent reflections                | 4749 [ $R(\text{int}) = 0.0354$ ]                                     |                            |
| Completeness to theta = 67.684°        | 99.5 %                                                                |                            |
| Absorption correction                  | Analytical                                                            |                            |
| Max. and min. transmission             | 0.778 and 0.657                                                       |                            |
| Refinement method                      | Full-matrix least-squares on $F^2$                                    |                            |
| Data / restraints / parameters         | 4749 / 1 / 372                                                        |                            |
| Goodness-of-fit on $F^2$               | 1.097                                                                 |                            |
| Final $R$ indices [ $I > 2\sigma(I)$ ] | $R1 = 0.0392$ , $wR2 = 0.1151$                                        |                            |
| $R$ indices (all data)                 | $R1 = 0.0409$ , $wR2 = 0.1164$                                        |                            |
| Extinction coefficient                 | n/a                                                                   |                            |
| Largest diff. peak and hole            | 1.025 and -0.406 e.Å <sup>-3</sup>                                    |                            |

<sup>a</sup> The water content is approximative, as the water molecules are strongly disordered. See cif file for more information about the modelling of the water molecules.



**Figure S6** ORTEP view of  $[\text{Cr}(\text{dqp})(\text{CN})_3]$  at 50% probability level with numbering scheme in the crystal structure of  $[\text{Cr}(\text{dqp})(\text{CN})_3] \cdot 3.28\text{H}_2\text{O}$ .

**Table S13** Selected bond distances ( $\text{\AA}$ ) and bond angles ( $^\circ$ ) for complex  $[\text{Cr}(\text{dqp})(\text{CN})_3] \cdot 3.28\text{H}_2\text{O}$ .

| Bond Distances / $\text{\AA}$ |      |                      |      |      |                      |
|-------------------------------|------|----------------------|------|------|----------------------|
| Atom                          | Atom | Length/ $\text{\AA}$ | Atom | Atom | Length/ $\text{\AA}$ |
| Cr1                           | N1   | 2.0726(16)           | Cr1  | C1   | 2.085(2)             |
| Cr1                           | N2   | 2.0436(17)           | Cr1  | C2   | 2.073(2)             |
| Cr1                           | N3   | 2.0709(16)           | Cr1  | C3   | 2.071(2)             |

| Bond Angles (°) |      |      |           |
|-----------------|------|------|-----------|
| Atom            | Atom | Atom | Angle /°  |
| N1              | Cr1  | C1   | 89.27(7)  |
| N2              | Cr1  | N1   | 88.19(6)  |
| N2              | Cr1  | N3   | 89.31(6)  |
| N2              | Cr1  | C1   | 94.94(8)  |
| N2              | Cr1  | C2   | 175.94(8) |
| N2              | Cr1  | C3   | 90.85(7)  |
| N3              | Cr1  | N1   | 176.71(6) |
| N3              | Cr1  | C1   | 88.81(7)  |
| N3              | Cr1  | C2   | 93.40(8)  |
| N3              | Cr1  | C3   | 88.27(7)  |
| C2              | Cr1  | N1   | 89.21(8)  |
| C2              | Cr1  | C1   | 88.15(9)  |
| C3              | Cr1  | N1   | 93.90(7)  |
| C3              | Cr1  | C1   | 173.49(8) |
| C3              | Cr1  | C2   | 86.22(8)  |

**Table S14** Selected least-squares planes data for complex  $[\text{Cr}(\text{dqp})(\text{CN})_3]\cdot 3.28\text{H}_2\text{O}$ .

| Plane                                                  | mean deviation in Å | max deviation in Å (atom) |
|--------------------------------------------------------|---------------------|---------------------------|
| <b>Py1:</b> N2 C13 C14 C15 C16 C17                     | 0.019               | 0.029 (C14)               |
| <b>Qui1:</b> N3 C18 C19 C20 C21 C22 C23<br>C24 C25 C26 | 0.072               | 0.128 (N3)                |
| <b>Qui2:</b> N1 C4 C5 C6 C7 C8 C9 C10<br>C11 C12       | 0.061               | 0.149 (C11)               |

Mean and maximum deviation between the atoms of the pyridine rings and their best plane.

| Planes                | Py1- Qui1 | Py1- Qui2 | Qui1- Qui2 |
|-----------------------|-----------|-----------|------------|
| Interplanar angle (°) | 36.31     | 38.24     | 74.55      |



**Figure S7** Optimized superimposition of the molecular structures of a) [Cr(tpy)Br<sub>3</sub>] (red) with [Cr(tpy)(CN)<sub>3</sub>] (blue), b) [Cr(ddpd)Br<sub>3</sub>] (red) with [Cr(ddpd)(CN)<sub>3</sub>] (blue) and c) [Cr(dqp)Cl<sub>3</sub>] (green) with [Cr(dqp)(CN)<sub>3</sub>] (blue). H atoms have been removed for clarity.



**Figure S8** View along the  $(-1\ 1\ 5)$  direction showing the  $\pi$ - $\pi$  interactions between the plane N2 C10 C9 C8 C7 C6 and its symmetry equivalent in the crystal structure of  $[\text{Cr}(\text{tpy})(\text{CN})_3]$ . The angle between the planes is  $0^\circ$ , the centroid-centroid distance is  $3.93\text{\AA}$ , and there is a shift of  $1.7\text{\AA}$  between the projection of one centroid and the other centroid, giving an effective plane-to-plane distance of about  $3.5\text{\AA}$ .



**Figure S9** View of the hydrogen-bonds in the crystal structure of  $[\text{Cr}(\text{ddpd})(\text{CN})_3]\cdot 2\text{H}_2\text{O}$ . Each hydrogen atoms of the water molecules is bound to the nitrogen atoms N3 and N4 of two adjacent complexes. N4 makes hydrogen bonds to a single water molecule whereas N3 make a hydrogen bond to two adjacent water molecules. This creates a complex path of hydrogen bonds interactions within the crystal, creating layers normal to the  $c$ -axis where all the complexes interact via hydrogen bonds.



**Figure S10** View of the crystal structure of  $[\text{Cr}(\text{ddpd})(\text{CN})_3]\cdot 2\text{H}_2\text{O}$  along the (1 0 0) direction displaying three layers of complexes and water molecules interacting via hydrogen bonds (the carbon atoms are depicted in violet, green and grey, respectively). The layers interact with each other via  $\pi$ - $\pi$  interactions (highlighted with black arrows) through the plane N1 C3 C4 C5 C6 C7 and its symmetrically equivalent plane (angle between the planes is  $0^\circ$ , the centroid-centroid distance is  $3.61\text{\AA}$ , and there is a shift of  $1.21\text{\AA}$  between the projection of one centroid and the other centroid, giving an effective plane-plane distance of about  $3.4\text{\AA}$ ).



**Figure S11** a) View along the (0 1 0) direction of the crystal structure of [Cr(dqp)(CN)<sub>3</sub>] $\cdot$ 3.28H<sub>2</sub>O showing the stacks made by the complexes and b) view of the  $\pi$ - $\pi$  interactions (indicated with black arrows) along one of the stacks involving the planes N2 C17 C16 C15 C14 C13 and their symmetry equivalents (angle between the planes is 0°, the centroid-centroid distance is 3.78 Å, and there is a shift of 0.7 Å between the projection of one centroid and the other centroid, giving an effective plane-plane distance of about 3.7 Å). Because of the presence of disordered interstitial water molecules, the hydrogen atoms positions could not be asserted unambiguously and the potential network of hydrogen bonds cannot be described precisely.

## Theoretical studies

The Gaussian 16 software package was used to perform structural optimizations of the investigated complexes.<sup>S5</sup> Starting from the X-ray diffraction structures, the ground state,  $^4A_2$ , structure of the different complexes was obtained from DFT optimizations using the unrestricted version of the Becke three-parameters exchange function in combination with the Lee-Yang-Parr correlation functional (UB3LYP). The basis set used for these optimizations was the 6-31G(d,p) for N, C and H and the LanL2DZ for the metal center. In addition, LANL2 pseudopotential was specified for the core electrons of the Cr atom. Solvent effects were included via the Polarizable Continuum Model (PCM) as implemented in Gaussian 16 with the dielectric constant of N,N-dimethylformamide (for [Cr(tpy)(CN)<sub>3</sub>]) and acetonitrile (for [Cr(ddpd)(CN)<sub>3</sub>] and [Cr(dqp)(CN)<sub>3</sub>]). Optimized geometries were confirmed to be stationary points by analysis of their vibrational frequencies. Orbital and spin density information was extracted from the optimized geometries. The 50 lowest energetic transitions were calculated by TD-DFT, using the unrestricted version of the Coulomb-attenuated B3LYP functional (UCAM-B3LYP), selecting the 6-31++G(d,p) basis set for N, C and H, and the LanL2DZ for the metal center. Same pseudopotential for the Cr atom and solvent effects were selected as for the ground state calculations. Electron Density Difference Maps (EDDM) were computed using GaussSum 3.0<sup>S6</sup> and are represented with an isoval=0.002 using GaussView 6.1.1.<sup>S7</sup>



**Figure S12** Spin density map for the quartet ground state  $^4A_2$  of [Cr(tpy)(CN)<sub>3</sub>]. (Isovalue = 0.004). Blue: positive spin density; Green: negative spin density.

**Table S15.** Calculated Mulliken charges and Spin densities of the optimized ground  $^4A_2$  state of compound  $[Cr(tpy)(CN)_3]$ .

|            |    | $^4A_2$         |                       |
|------------|----|-----------------|-----------------------|
|            |    | Mulliken charge | Mulliken Spin density |
| 1          | Cr | 0.425262        | 3.064047              |
| 2          | N  | -0.545698       | -0.039201             |
| 3          | N  | -0.607889       | -0.047181             |
| 4          | N  | -0.545698       | -0.039201             |
| 5          | N  | -0.461640       | 0.093646              |
| 6          | N  | -0.451562       | 0.112876              |
| 7          | N  | -0.461639       | 0.093647              |
| 8          | C  | 0.119159        | 0.015867              |
| 9          | H  | 0.167252        | -0.001468             |
| 10         | C  | -0.088560       | -0.007400             |
| 11         | H  | 0.152400        | 0.000348              |
| 12         | C  | -0.056960       | 0.015876              |
| 13         | H  | 0.155423        | -0.000654             |
| 14         | C  | -0.090502       | -0.006424             |
| 15         | H  | 0.153286        | -0.000159             |
| 16         | C  | 0.305177        | 0.008778              |
| 17         | C  | 0.306543        | 0.017878              |
| 18         | C  | -0.087920       | -0.008454             |
| 19         | H  | 0.158337        | 0.000280              |
| 20         | C  | -0.065631       | 0.021995              |
| 21         | H  | 0.159772        | -0.000956             |
| 22         | C  | -0.087920       | -0.008454             |
| 23         | H  | 0.158337        | 0.000280              |
| 24         | C  | 0.306543        | 0.017878              |
| 25         | C  | 0.305177        | 0.008778              |
| 26         | C  | -0.090502       | -0.006424             |
| 27         | H  | 0.153286        | -0.000159             |
| 28         | C  | -0.056960       | 0.015876              |
| 29         | H  | 0.155423        | -0.000654             |
| 30         | C  | -0.088560       | -0.007400             |
| 31         | H  | 0.152400        | 0.000348              |
| 32         | C  | 0.119159        | 0.015867              |
| 33         | H  | 0.167252        | -0.001468             |
| 34         | C  | 0.065425        | -0.103886             |
| 35         | C  | 0.036603        | -0.120833             |
| 36         | C  | 0.065424        | -0.103886             |
| <b>Sum</b> |    | <b>0.000000</b> | <b>3.000000</b>       |

**Table S16** Calculated 50 lowest energetic excitation transitions for compound [Cr(tpy)(CN)<sub>3</sub>] and their energies (in nm) and oscillatory strength (in cgs units). Energies were corrected by  $-0.15$  eV to better fit the experimental results.

| Transition number | Wavelength / nm | Osc. Strength /cgs | Transition number | Wavelength / nm | Osc. Strength / cgs |
|-------------------|-----------------|--------------------|-------------------|-----------------|---------------------|
| 1                 | 462.14          | 0.0001             | 26                | 242.41          | 0.0001              |
| 2                 | 450.96          | 0.0029             | 27                | 242.20          | 0.0000              |
| 3                 | 441.79          | 0.0000             | 28                | 240.86          | 0.0282              |
| 4                 | 418.62          | 0.0028             | 29                | 237.92          | 0.0000              |
| 5                 | 386.78          | 0.0000             | 30                | 237.92          | 0.0174              |
| 6                 | 342.22          | 0.0004             | 31                | 237.75          | 0.0000              |
| 7                 | 336.48          | 0.0483             | 32                | 237.14          | 0.0093              |
| 8                 | 330.95          | 0.0007             | 33                | 236.88          | 0.0000              |
| 9                 | 315.04          | 0.0103             | 34                | 236.06          | 0.0023              |
| 10                | 312.70          | 0.2885             | 35                | 235.12          | 0.0000              |
| 11                | 305.11          | 0.0000             | 36                | 234.12          | 0.0001              |
| 12                | 301.06          | 0.0014             | 37                | 233.67          | 0.0085              |
| 13                | 300.53          | 0.0224             | 38                | 231.99          | 0.0799              |
| 14                | 293.31          | 0.0144             | 39                | 231.77          | 0.0016              |
| 15                | 285.90          | 0.0034             | 40                | 230.92          | 0.0135              |
| 16                | 284.17          | 0.0122             | 41                | 229.02          | 0.0002              |
| 17                | 279.76          | 0.1883             | 42                | 228.14          | 0.0273              |
| 18                | 263.09          | 0.0971             | 43                | 226.74          | 0.0006              |
| 19                | 257.49          | 0.0316             | 44                | 226.04          | 0.0561              |
| 20                | 255.76          | 0.0000             | 45                | 224.94          | 0.0011              |
| 21                | 252.22          | 0.1063             | 46                | 224.87          | 0.0112              |
| 22                | 248.88          | 0.0322             | 47                | 223.93          | 0.0000              |
| 23                | 245.80          | 0.0005             | 48                | 221.51          | 0.0402              |
| 24                | 244.97          | 0.0029             | 49                | 220.93          | 0.0000              |
| 25                | 243.80          | 0.0000             | 50                | 218.91          | 0.2332              |



**Figure S13.** Oscillatory strength of the 50 first simulated excitation transitions (red) and experimental UV-Vis spectrum of compound  $[\text{Cr}(\text{tpy})(\text{CN})_3]$  at  $1.64 \times 10^{-5}$  M in DMF. a) Full view and b) zoom view.



**Figure S14** Electron density difference maps (EDDM) for the first 30 transitions of compound  $[\text{Cr}(\text{tpy})(\text{CN})_3]$ . Purple and blue lobes indicate loss and gain of electron density, respectively.



**Figure S15** Spin density map of the quartet ground state  $^4A_2$  (Isovalue = 0.004) of  $[\text{Cr}(\text{ddpd})(\text{CN})_3]$ .  
Blue: positive spin density; Green: negative spin density.

**Table S17.** Calculated Mulliken charges and Spin densities of the optimized ground  $^4A_2$  state of compound  $[Cr(ddpd)(CN)_3]$ .

|            |    | $^4A_2$         |                       |
|------------|----|-----------------|-----------------------|
|            |    | Mulliken charge | Mulliken Spin density |
| 1          | Cr | 0.390201        | 3.100977              |
| 2          | N  | -0.521802       | -0.043791             |
| 3          | N  | -0.558147       | -0.035321             |
| 4          | N  | -0.46377        | 0.095445              |
| 5          | N  | -0.463885       | 0.089984              |
| 6          | N  | -0.497726       | 0.005944              |
| 7          | C  | 0.038116        | -0.117403             |
| 8          | C  | 0.051819        | -0.102091             |
| 9          | C  | 0.127352        | 0.011712              |
| 10         | H  | 0.157114        | -0.001351             |
| 11         | C  | -0.108309       | -0.007517             |
| 12         | H  | 0.139453        | 0.000219              |
| 13         | C  | -0.059683       | 0.014723              |
| 14         | H  | 0.145305        | -0.000586             |
| 15         | C  | -0.109752       | -0.008807             |
| 16         | H  | 0.143849        | 0.000051              |
| 17         | C  | 0.487855        | 0.010724              |
| 18         | C  | -0.20655        | -0.000297             |
| 19         | H  | 0.147571        | 0.00042               |
| 20         | H  | 0.158384        | 0.000186              |
| 21         | H  | 0.157693        | 0.000191              |
| 22         | C  | 0.469114        | 0.0094                |
| 23         | C  | -0.106536       | -0.007435             |
| 24         | H  | 0.143777        | 0.000304              |
| 25         | C  | -0.064368       | 0.012873              |
| 26         | H  | 0.14788         | -0.000535             |
| 27         | N  | -0.521803       | -0.043791             |
| 28         | N  | -0.497725       | 0.005944              |
| 29         | C  | 0.127352        | 0.011712              |
| 30         | H  | 0.157114        | -0.001351             |
| 31         | C  | -0.108309       | -0.007517             |
| 32         | H  | 0.139453        | 0.000219              |
| 33         | C  | -0.059683       | 0.014723              |
| 34         | H  | 0.145305        | -0.000586             |
| 35         | C  | -0.109752       | -0.008807             |
| 36         | H  | 0.143849        | 0.000051              |
| 37         | C  | 0.487856        | 0.010724              |
| 38         | C  | -0.206549       | -0.000297             |
| 39         | H  | 0.147572        | 0.00042               |
| 40         | H  | 0.158384        | 0.000186              |
| 41         | H  | 0.157694        | 0.000191              |
| 42         | C  | 0.469115        | 0.0094                |
| 43         | C  | -0.106536       | -0.007435             |
| 44         | H  | 0.143777        | 0.000304              |
| 45         | N  | -0.463885       | 0.089984              |
| 46         | C  | 0.051819        | -0.102091             |
| <b>Sum</b> |    | <b>0.000000</b> | <b>3.000000</b>       |

**Table S18.** Calculated 50 lowest energetic excitation transitions for compound [Cr(ddpd)(CN)<sub>3</sub>] and their energies (in nm) and oscillatory strength (in cgs units). Energies were corrected by  $-0.05$  eV to better fit the experimental results.

| Transition number | Wavelength / nm | Osc. Strength / cgs | Transition number | Wavelength / nm | Osc. Strength / cgs |
|-------------------|-----------------|---------------------|-------------------|-----------------|---------------------|
| 1                 | 415.90          | 0.0004              | 26                | 246.37          | 0.0510              |
| 2                 | 402.55          | 0.0000              | 27                | 245.24          | 0.0004              |
| 3                 | 369.69          | 0.0065              | 28                | 243.14          | 0.0100              |
| 4                 | 367.72          | 0.0010              | 29                | 241.26          | 0.0294              |
| 5                 | 359.98          | 0.0003              | 30                | 240.46          | 0.0228              |
| 6                 | 351.88          | 0.0024              | 31                | 237.53          | 0.0198              |
| 7                 | 351.26          | 0.0011              | 32                | 236.04          | 0.0434              |
| 8                 | 344.35          | 0.0014              | 33                | 234.15          | 0.0020              |
| 9                 | 341.89          | 0.0013              | 34                | 232.48          | 0.0000              |
| 10                | 340.56          | 0.0012              | 35                | 232.41          | 0.0079              |
| 11                | 308.14          | 0.1578              | 36                | 231.48          | 0.0157              |
| 12                | 306.53          | 0.0010              | 37                | 229.75          | 0.0031              |
| 13                | 298.06          | 0.1061              | 38                | 228.35          | 0.1689              |
| 14                | 296.81          | 0.0014              | 39                | 227.92          | 0.0043              |
| 15                | 285.72          | 0.0517              | 40                | 226.95          | 0.0356              |
| 16                | 283.61          | 0.0046              | 41                | 226.72          | 0.0014              |
| 17                | 277.19          | 0.0232              | 42                | 224.95          | 0.0369              |
| 18                | 270.27          | 0.0138              | 43                | 224.36          | 0.0053              |
| 19                | 267.61          | 0.0034              | 44                | 223.00          | 0.0028              |
| 20                | 267.29          | 0.0019              | 45                | 222.04          | 0.0025              |
| 21                | 265.47          | 0.0064              | 46                | 221.07          | 0.0007              |
| 22                | 262.47          | 0.1013              | 47                | 220.41          | 0.0021              |
| 23                | 260.50          | 0.1037              | 48                | 219.08          | 0.0194              |
| 24                | 249.64          | 0.0646              | 49                | 218.10          | 0.0120              |
| 25                | 247.86          | 0.0038              | 50                | 217.46          | 0.0158              |



**Figure S16.** Oscillatory strength of the 50 first simulated excitation transitions (red) and experimental UV-Vis spectrum of compound  $[\text{Cr}(\text{ddpd})(\text{CN})_3]$  at  $1.75 \times 10^{-5}$  M in acetonitrile. a) Full view and b) zoom view.



**Figure S17** Electron density difference maps (EDDM) for the first 30 transitions of compound  $[\text{Cr}(\text{ddpd})(\text{CN})_3]$ . Purple and blue lobes indicate loss and gain of electron density, respectively.



**Figure S18** Spin density map of the quartet ground state  $^4A_2$  of  $[\text{Cr}(\text{dqp})(\text{CN})_3]$  (Isovalue = 0.004).  
Blue: positive spin density; Green: negative spin density.

**Table S19** Calculated Mulliken charges and Spin densities of the optimized ground  $^4A_2$  state of compound  $[Cr(dqp)(CN)_3]$ .

|            |    | $^4A_2$         |                       |
|------------|----|-----------------|-----------------------|
|            |    | Mulliken charge | Mulliken Spin density |
| 1          | Cr | 0.369518        | 3.109989              |
| 2          | N  | -0.53769        | -0.046458             |
| 3          | N  | -0.574462       | -0.040885             |
| 4          | N  | -0.53769        | -0.046457             |
| 5          | C  | 0.140083        | 0.018117              |
| 6          | H  | 0.163102        | -0.001703             |
| 7          | C  | -0.110423       | -0.009871             |
| 8          | H  | 0.146187        | 0.000218              |
| 9          | C  | -0.075031       | 0.018704              |
| 10         | H  | 0.149964        | -0.000809             |
| 11         | C  | 0.114678        | -0.00822              |
| 12         | C  | -0.122362       | 0.00762               |
| 13         | H  | 0.135596        | -0.00043              |
| 14         | C  | -0.089757       | -0.005205             |
| 15         | H  | 0.131783        | 0.000197              |
| 16         | C  | -0.145039       | 0.008004              |
| 17         | H  | 0.138771        | -0.000362             |
| 18         | C  | 0.050744        | -0.0065               |
| 19         | C  | 0.259673        | 0.006767              |
| 20         | C  | 0.294364        | 0.01309               |
| 21         | C  | -0.109084       | -0.010116             |
| 22         | H  | 0.14613         | 0.000369              |
| 23         | C  | -0.054167       | 0.015687              |
| 24         | H  | 0.149071        | -0.00071              |
| 25         | C  | -0.109084       | -0.010116             |
| 26         | H  | 0.14613         | 0.000369              |
| 27         | C  | 0.294363        | 0.01309               |
| 28         | C  | 0.050745        | -0.006499             |
| 29         | C  | -0.145039       | 0.008003              |
| 30         | H  | 0.138771        | -0.000362             |
| 31         | C  | -0.089757       | -0.005204             |
| 32         | H  | 0.131783        | 0.000197              |
| 33         | C  | -0.122362       | 0.007619              |
| 34         | H  | 0.135596        | -0.00043              |
| 35         | C  | 0.114678        | -0.00822              |
| 36         | C  | 0.259673        | 0.006767              |
| 37         | C  | -0.075031       | 0.018703              |
| 38         | H  | 0.149964        | -0.000809             |
| 39         | C  | -0.110423       | -0.00987              |
| 40         | H  | 0.146187        | 0.000218              |
| 41         | C  | 0.140084        | 0.018117              |
| 42         | H  | 0.163102        | -0.001703             |
| 43         | C  | 0.043901        | -0.100979             |
| 44         | N  | -0.458634       | 0.088286              |
| 45         | C  | 0.038491        | -0.11388              |
| 46         | N  | -0.462365       | 0.088363              |
| 47         | C  | 0.043901        | -0.100979             |
| 48         | N  | -0.458633       | 0.088286              |
| <b>Sum</b> |    | <b>0.000000</b> | <b>3.000000</b>       |

**Table S20** Calculated 50 lowest energetic excitation transitions for compound [Cr(dqp)(CN)<sub>3</sub>] and their energies (in nm) and oscillatory strength (in cgs units).

| Transition<br>number | Wavelength<br>/ nm | Osc. Strength<br>/ cgs | Transition<br>number | Wavelength<br>/ nm | Osc. Strength<br>/ cgs |
|----------------------|--------------------|------------------------|----------------------|--------------------|------------------------|
| 1                    | 517.55             | 0.0000                 | 26                   | 262.05             | 0.0162                 |
| 2                    | 509.85             | 0.0000                 | 27                   | 258.87             | 0.0069                 |
| 3                    | 420.44             | 0.0002                 | 28                   | 257.23             | 0.0579                 |
| 4                    | 410.7              | 0.0000                 | 29                   | 254.7              | 0.0006                 |
| 5                    | 368.48             | 0.0000                 | 30                   | 252.11             | 0.0061                 |
| 6                    | 359.25             | 0.0005                 | 31                   | 249.9              | 0.0141                 |
| 7                    | 355.78             | 0.0044                 | 32                   | 248.96             | 0.0181                 |
| 8                    | 349.62             | 0.0001                 | 33                   | 245.17             | 0.0472                 |
| 9                    | 346.15             | 0.0164                 | 34                   | 244.37             | 0.0191                 |
| 10                   | 344.01             | 0.0013                 | 35                   | 243.54             | 0.0108                 |
| 11                   | 321.94             | 0.5406                 | 36                   | 242.03             | 0.0203                 |
| 12                   | 307.26             | 0.0344                 | 37                   | 239.05             | 0.0043                 |
| 13                   | 306.23             | 0.0000                 | 38                   | 238.64             | 0.0484                 |
| 14                   | 304.65             | 0.0288                 | 39                   | 236.03             | 0.0006                 |
| 15                   | 299.97             | 0.0019                 | 40                   | 235.75             | 0.0183                 |
| 16                   | 294.06             | 0.0013                 | 41                   | 234.46             | 0.0351                 |
| 17                   | 288.64             | 0.0029                 | 42                   | 233.54             | 0.0066                 |
| 18                   | 288.4              | 0.0007                 | 43                   | 233.39             | 0.0093                 |
| 19                   | 283.23             | 0.0313                 | 44                   | 233.23             | 0.0637                 |
| 20                   | 282.54             | 0.0768                 | 45                   | 232.13             | 0.0172                 |
| 21                   | 282.17             | 0.0430                 | 46                   | 229.97             | 0.0007                 |
| 22                   | 280.08             | 0.0112                 | 47                   | 229.89             | 0.0283                 |
| 23                   | 277.38             | 0.0004                 | 48                   | 228.88             | 0.0212                 |
| 24                   | 276.96             | 0.0013                 | 49                   | 228.4              | 0.0010                 |
| 25                   | 268.86             | 0.0046                 | 50                   | 227.66             | 0.0719                 |



**Figure S19** Oscillatory strength of the 50 first simulated excitation transitions (red) and experimental UV-Vis spectrum of compound  $[\text{Cr}(\text{dqp})(\text{CN})_3]$  at  $1.94 \times 10^{-5}$  M in acetonitrile. a) Full view and b) zoom view.



**Figure S20** Electron density difference maps (EDDM) for the first 30 transitions of compound  $[\text{Cr}(\text{dqp})(\text{CN})_3]$ . Purple and blue lobes indicate loss and gain of electron density, respectively.



**Figure S21** Normalized solid state absorption spectra (recorded in transmittance mode, black traces) and solution emission spectra ( $c = 2 \cdot 10^{-5} \text{ M}$  in DMF,  $\nu_{\text{exc}}^{\circ} = 28750 \text{ cm}^{-1}$ ,  $\lambda_{\text{exc}} = 350 \text{ nm}$ , orange traces) recorded for the heteroleptic complexes  $[\text{Cr}(\text{tpy})\text{X}_3]$  ( $\text{X} = \text{Cl}, \text{Br}, \text{CN}$ ).



**Figure S22** Normalized solid state absorption spectra (recorded in transmittance mode, black traces) and solution emission spectra ( $c = 2 \cdot 10^{-5} \text{ M}$  in DMF for  $X = \text{Cl}, \text{Br}$  and in acetonitrile (298 K) or acetonitrile/propionitrile (3:1, 77K) for  $X = \text{CN}$ ,  $\nu_{\text{exc}}^0 = 28750 \text{ cm}^{-1}$ ,  $\lambda_{\text{exc}} = 350 \text{ nm}$ , orange traces) recorded for the heteroleptic complexes [Cr(ddpd)X<sub>3</sub>] ( $X = \text{Cl}, \text{Br}, \text{CN}$ ). \* represents the hypothetical OH overtone (see main text).



**Figure S23** Normalized solid state absorption spectra (recorded in transmittance mode, black traces) and solution emission spectra ( $c = 2 \cdot 10^{-5}$  M in DMF for  $X = \text{Cl}, \text{Br}$ , in acetonitrile (298 K) or acetonitrile/propionitrile (3:1, 77K) for  $X = \text{CN}$ ,  $\nu_{\text{exc}}^0 = 28750 \text{ cm}^{-1}$ ,  $\lambda_{\text{exc}} = 350 \text{ nm}$ , orange traces) recorded for the heteroleptic complexes  $[\text{Cr}(\text{dqp})\text{X}_3]$  ( $X = \text{Cl}, \text{Br}, \text{CN}$ ). \* represents the hypothetical OH overtone (see main text)

**Coordinates of the DFT optimized geometries**[Cr(tpy)(CN)<sub>3</sub>]

|    |             |             |             |
|----|-------------|-------------|-------------|
| Cr | 0.00000000  | 0.91096400  | -0.00005700 |
| N  | 2.04721100  | 0.48002200  | -0.00010200 |
| N  | 0.00000000  | -1.10817400 | 0.00007400  |
| N  | -2.04721100 | 0.48002100  | 0.00004500  |
| N  | -0.00011500 | 0.95894400  | -3.24722300 |
| N  | -0.00000200 | 4.14062500  | -0.00028300 |
| N  | 0.00011900  | 0.95938500  | 3.24710300  |
| C  | 3.03378100  | 1.38812400  | -0.00019500 |
| H  | 2.72683900  | 2.42754100  | -0.00025300 |
| C  | 4.37676500  | 1.01962200  | -0.00021700 |
| H  | 5.14368700  | 1.78500000  | -0.00029400 |
| C  | 4.69912900  | -0.33572600 | -0.00013700 |
| H  | 5.73482200  | -0.65760900 | -0.00015100 |
| C  | 3.67455000  | -1.28167000 | -0.00004000 |
| H  | 3.90565300  | -2.33958200 | 0.00002300  |
| C  | 2.35012100  | -0.84762700 | -0.00002400 |
| C  | 1.18102900  | -1.75262100 | 0.00007200  |
| C  | 1.21215000  | -3.14883100 | 0.00015300  |
| H  | 2.15045900  | -3.68878500 | 0.00015100  |
| C  | 0.00000000  | -3.83986900 | 0.00023500  |
| H  | 0.00000000  | -4.92424200 | 0.00029800  |
| C  | -1.21215000 | -3.14883100 | 0.00023600  |
| H  | -2.15045800 | -3.68878600 | 0.00029900  |
| C  | -1.18102900 | -1.75262200 | 0.00015300  |
| C  | -2.35012100 | -0.84762700 | 0.00013800  |
| C  | -3.67455000 | -1.28167100 | 0.00021100  |
| H  | -3.90565400 | -2.33958300 | 0.00028500  |
| C  | -4.69912900 | -0.33572700 | 0.00018900  |
| H  | -5.73482200 | -0.65761000 | 0.00024600  |
| C  | -4.37676500 | 1.01962100  | 0.00009500  |
| H  | -5.14368700 | 1.78500000  | 0.00007500  |
| C  | -3.03378100 | 1.38812300  | 0.00002400  |
| H  | -2.72684000 | 2.42754000  | -0.00005000 |
| C  | -0.00007500 | 0.94582500  | -2.07773400 |
| C  | -0.00000300 | 2.97076900  | -0.00020300 |
| C  | 0.00007600  | 0.94611000  | 2.07761600  |

[Cr(ddpd)(CN)<sub>3</sub>]

|    |             |             |             |
|----|-------------|-------------|-------------|
| Cr | -0.00000100 | 0.84577500  | -0.00000100 |
| N  | 2.02544800  | 0.71955600  | 0.48040600  |
| N  | 0.00000100  | -1.24238700 | -0.00000400 |
| N  | -0.00000600 | 4.07621800  | 0.00001500  |
| N  | 0.67669600  | 1.03311000  | -3.17986400 |
| N  | 2.22116300  | -1.21585900 | -0.86986300 |
| C  | -0.00000500 | 2.90673200  | 0.00000900  |
| C  | 0.45891800  | 0.93829500  | -2.03434400 |
| C  | 2.58687500  | 1.66751800  | 1.26795400  |
| H  | 1.89549400  | 2.35217400  | 1.74024600  |
| C  | 3.95258300  | 1.78347400  | 1.44507900  |
| H  | 4.35260100  | 2.56889700  | 2.07469700  |
| C  | 4.78153800  | 0.87000200  | 0.78688300  |
| H  | 5.85984900  | 0.92115200  | 0.89668300  |
| C  | 4.21634700  | -0.12995800 | 0.01126800  |
| H  | 4.84449500  | -0.87048700 | -0.46383900 |
| C  | 2.81649100  | -0.19811000 | -0.11485100 |
| C  | 3.04068900  | -1.85166700 | -1.91298600 |
| H  | 3.75612100  | -2.58176300 | -1.51816800 |
| H  | 3.58474300  | -1.07290100 | -2.44837700 |
| H  | 2.37656100  | -2.35012600 | -2.61860900 |
| C  | 1.09123200  | -1.92736200 | -0.42519000 |
| C  | 1.11836300  | -3.32561200 | -0.43756900 |
| H  | 2.00853400  | -3.85354500 | -0.74951900 |
| C  | 0.00000800  | -4.02162700 | 0.00000000  |
| H  | 0.00001000  | -5.10647300 | 0.00000200  |
| N  | -2.02544700 | 0.71955000  | -0.48040900 |
| N  | -2.22116200 | -1.21587000 | 0.86985400  |
| C  | -2.58687500 | 1.66751400  | -1.26795500 |
| H  | -1.89549400 | 2.35216800  | -1.74024900 |
| C  | -3.95258300 | 1.78347200  | -1.44507500 |
| H  | -4.35260100 | 2.56889700  | -2.07469100 |
| C  | -4.78153800 | 0.87000200  | -0.78687700 |
| H  | -5.85984900 | 0.92115400  | -0.89667300 |
| C  | -4.21634600 | -0.12996000 | -0.01126500 |
| H  | -4.84449400 | -0.87048900 | 0.46384300  |
| C  | -2.81649000 | -0.19811600 | 0.11484900  |
| C  | -3.04068600 | -1.85167900 | 1.91297800  |
| H  | -3.75611800 | -2.58177500 | 1.51816000  |
| H  | -3.58473800 | -1.07291400 | 2.44837200  |
| H  | -2.37655600 | -2.35013900 | 2.61859900  |

|   |             |             |            |
|---|-------------|-------------|------------|
| C | -1.09122700 | -1.92736600 | 0.42518500 |
| C | -1.11835000 | -3.32561600 | 0.43756800 |
| H | -2.00852000 | -3.85355300 | 0.74951800 |
| N | -0.67671500 | 1.03308800  | 3.17986100 |
| C | -0.45892200 | 0.93827700  | 2.03434400 |

[Cr(dqp)(CN)<sub>3</sub>]

|    |             |             |             |
|----|-------------|-------------|-------------|
| Cr | 0.00000000  | -0.81610500 | 0.00000300  |
| N  | 1.92334100  | -0.74770100 | -0.84799500 |
| N  | 0.00000000  | 1.27051300  | 0.00000000  |
| N  | -1.92334300 | -0.74769900 | 0.84799600  |
| C  | 2.32007700  | -1.75477400 | -1.62466400 |
| H  | 1.53486900  | -2.34135200 | -2.08418100 |
| C  | 3.67023100  | -2.09171100 | -1.81725700 |
| H  | 3.92659200  | -2.91814700 | -2.46907700 |
| C  | 4.62428600  | -1.39832900 | -1.10940500 |
| H  | 5.67322300  | -1.67315400 | -1.16582300 |
| C  | 4.24195700  | -0.30403500 | -0.29508300 |
| C  | 5.18760100  | 0.42329800  | 0.47102100  |
| H  | 6.22910600  | 0.11883400  | 0.44620700  |
| C  | 4.77330700  | 1.48612200  | 1.23811000  |
| H  | 5.47762500  | 2.02905300  | 1.85885700  |
| C  | 3.43148100  | 1.91357300  | 1.18071200  |
| H  | 3.15022800  | 2.79146800  | 1.75074600  |
| C  | 2.46755900  | 1.26267200  | 0.41601000  |
| C  | 2.85855500  | 0.05914400  | -0.25210400 |
| C  | 1.16271500  | 1.94969100  | 0.19960000  |
| C  | 1.18298700  | 3.35180800  | 0.15714100  |
| H  | 2.12298300  | 3.88010000  | 0.23513800  |
| C  | 0.00000400  | 4.05660800  | -0.00001000 |
| H  | 0.00000600  | 5.14136100  | -0.00001400 |
| C  | -1.18298000 | 3.35181000  | -0.15715400 |
| H  | -2.12297400 | 3.88010600  | -0.23515500 |
| C  | -1.16271300 | 1.94969300  | -0.19960400 |
| C  | -2.46756000 | 1.26267700  | -0.41600800 |
| C  | -3.43148200 | 1.91358000  | -1.18070700 |
| H  | -3.15022900 | 2.79147500  | -1.75074000 |
| C  | -4.77330900 | 1.48613200  | -1.23810300 |
| H  | -5.47762700 | 2.02906700  | -1.85884600 |
| C  | -5.18760300 | 0.42330500  | -0.47101900 |
| H  | -6.22910800 | 0.11884200  | -0.44620600 |

|   |             |             |             |
|---|-------------|-------------|-------------|
| C | -4.24195800 | -0.30403300 | 0.29508000  |
| C | -2.85855600 | 0.05914700  | 0.25210400  |
| C | -4.62428700 | -1.39833500 | 1.10939100  |
| H | -5.67322300 | -1.67316600 | 1.16580100  |
| C | -3.67023300 | -2.09171900 | 1.81724300  |
| H | -3.92659500 | -2.91816100 | 2.46905500  |
| C | -2.32008000 | -1.75477600 | 1.62465900  |
| H | -1.53487200 | -2.34135200 | 2.08418000  |
| C | 0.79060000  | -0.91620400 | 1.92911200  |
| N | 1.17681500  | -1.01390600 | 3.02888100  |
| C | 0.00000500  | -2.88369800 | 0.00000800  |
| N | 0.00000900  | -4.05312100 | 0.00000900  |
| C | -0.79060500 | -0.91622200 | -1.92910300 |
| N | -1.17682200 | -1.01394500 | -3.02886900 |

**References**

- S1 C. K. Jorgensen, *Adv. Chem. Phys.*, **1963**, 5, 33-146.
- S2 J.-R. Jiménez, B. Doistau, C. Besnard and C. Piguet, *Chem. Commun.*, **2018**, 54, 13228-13231.
- S3 S. Otto, M. Dorn, C. Förster, M. Bauer, M. Seitz and K. Heinze, *Coord. Chem. Rev.*, **2018**, 359, 102-111.
- S4 J.-R. Jiménez, B. Doistau, C. M. Cruz, C. Besnard, J. M. Cuerva, A. G. Campana and C. Piguet, *J. Am. Chem. Soc.*, **2019**, 141, 13244-13252.
- S5 Gaussian 16, Revision A.03, M. J. Frisch, G. W. Trucks, H. B. Schlegel, G. E. Scuseria, M. A. Robb, J. R. Cheeseman, G. Scalmani, V. Barone, G. A. Petersson, H. Nakatsuji, X. Li, M. Caricato, A. V. Marenich, J. Bloino, B. G. Janesko, R. Gomperts, B. Mennucci, H. P. Hratchian, J. V. Ortiz, A. F. Izmaylov, J. L. Sonnenberg, D. Williams-Young, F. Ding, F. Lipparini, F. Egidi, J. Goings, B. Peng, A. Petrone, T. Henderson, D. Ranasinghe, V. G. Zakrzewski, J. Gao, N. Rega, G. Zheng, W. Liang, M. Hada, M. Ehara, K. Toyota, R. Fukuda, J. Hasegawa, M. Ishida, T. Nakajima, Y. Honda, O. Kitao, H. Nakai, T. Vreven, K. Throssell, J. A. Montgomery, Jr., J. E. Peralta, F. Ogliaro, M. J. Bearpark, J. J. Heyd, E. N. Brothers, K. N. Kudin, V. N. Staroverov, T. A. Keith, R. Kobayashi, J. Normand, K. Raghavachari, A. P. Rendell, J. C. Burant, S. S. Iyengar, J. Tomasi, M. Cossi, J. M. Millam, M. Klene, C. Adamo, R. Cammi, J. W. Ochterski, R. L. Martin, K. Morokuma, O. Farkas, J. B. Foresman, and D. J. Fox, Gaussian, Inc., Wallingford CT, **2016**.
- S6 N. M. O'Boyle, A. L. Tenderholt and K. M. Langner, *J. Comp. Chem.*, **2008**, 29, 839-845.
- S7 GaussView, Version 6.1.1, Roy Dennington, Todd A. Keith, and John M. Millam, Semichem Inc., Shawnee Mission, KS, **2016**.
